# Supplementary material for: Computing UV/vis spectra using a combined molecular dynamics and quantum chemistry approach: bis-triazin-pyridine (BTP) ligands studied in solution
Source: Royal Society of Chemistry journal article supplement (doi:10.1039/c5cp07540h), 2016-01-01
Supplement: c5cp07540h1.pdf [file c5cp07540h1.pdf]

# Computing UV/vis spectra using a combined molecular dynamics and quantum chemistry approach: bis-triazin-pyridine (BTP) ligands studied in solution

Sebastian Höfener <sup>\*1</sup>, Michael Trumm <sup>†2</sup>, Carsten Koke<sup>2,3</sup>, Johannes Heuser<sup>1</sup>, Ulf Ekström<sup>4</sup>, Andrej Skerencak-Frech<sup>2,3</sup>, Bernd Schimmelpfennig<sup>2</sup>, and Petra J. Panak<sup>2,3</sup>

<sup>1</sup>*Institut für Physikalische Chemie, Karlsruher Institut für Technologie, D-76131 Karlsruhe, Germany*

<sup>2</sup>*Institut für Nukleare Entsorgung (INE), Karlsruher Institut für Technologie, D-76131 Karlsruhe, Germany*

<sup>3</sup>*Ruprecht Karls Universität Heidelberg, Physikalisch-Chemisches Institut, Im Neuenheimer Feld 253, D-69120 Heidelberg, Germany*

<sup>4</sup>*Centre for Theoretical and Computational Chemistry (CTCC), Department of Chemistry, University of Oslo, P.O. Box 1033 Blindern, N-0315 Oslo, Norway*

February 12, 2016

---

\*Sebastian.Hoefener2@kit.edu

†Michael.Trumm@kit.edu

# 1 SUPPLEMENTARY INFORMATION

$$U^{shb} = \sum f(r)g(\psi) = d_e \left[ 1 - \xi \sum \exp\left(\frac{-(r - r_e)^2}{\gamma_{rt}}\right) \right] \exp\left(\frac{-(r - r_e)^2}{\gamma_r}\right) \exp\left(\frac{-(\psi - \psi_e)^2}{\gamma_\psi}\right) \quad (\text{SI.1})$$

$$U^{pol} = \frac{1}{2} \sum_i \frac{\mu_i^2}{\alpha_i} - \sum_i \mu_i E_i^q - \frac{1}{2} \sum_i \sum_{k \neq i} \mu_i T_{ik} \mu_k. \quad (\text{SI.2})$$

$$T_{ik} = 3\lambda_5 \frac{\mathbf{r}_i \cdot \mathbf{r}_k}{|\mathbf{r}_i - \mathbf{r}_k|^5} - \lambda_3 \frac{\mathbf{1}}{|\mathbf{r}_i - \mathbf{r}_k|^3} \quad (\text{SI.3})$$

$$\lambda_5 = 1 - \exp(-ar_{ik}^3) \quad (\text{SI.4})$$

$$\lambda_3 = 1 - (1 + ar_{ik}^3) \exp(-ar_{ik}) \quad (\text{SI.5})$$

$$U^{rep} = \sum_{i < k} A_{ik} \exp(-B_{ik} r_{ik}) \quad (\text{SI.6})$$

**Table SI.1:** Optimized force-field parameters according to equations (SI.1) - (SI.6).

| Energy term    | Unit              | Parameter          | Value     | Parameter          | Value     |
|----------------|-------------------|--------------------|-----------|--------------------|-----------|
| $U^{pol}$      | $\text{\AA}^{-3}$ | $a_{OC}$           | 0.080     | $a_{HC}$ (wat/lig) | 0.050     |
|                | $\text{\AA}^{-3}$ | $a_{ON}$           | 0.139     | $a_{HN}$ (wat/lig) | 0.050     |
|                | $\text{\AA}^{-3}$ | $a_{HH}$ (lig/wat) | 0.500     | $a_{HH}$ (lig/lig) | 0.500     |
|                | $\text{\AA}^{-3}$ | $a_{OH}$ (wat/lig) | 0.500     |                    |           |
| $U^{rep}$      | $\text{\AA}^{-1}$ | $B_{OC}$           | 5.694     | $B_{HC}$ (wat/lig) | 6.699     |
|                | $\text{\AA}^{-1}$ | $B_{ON}$           | 5.113     | $B_{HN}$           | 6.773     |
|                | $\text{\AA}^{-1}$ | $B_{HH}$ (lig/wat) | 7.000     | $B_{HH}$ (lig/lig) | 6.000     |
|                | $\text{\AA}^{-1}$ | $B_{CC}$           | 4.140     | $B_{NN}$           | 4.500     |
|                | $\text{\AA}^{-1}$ | $B_{CN}$           | 4.025     | $B_{OH}$ (wat/lig) | 5.900     |
|                | kcal/mol          | $A_{OC}$           | 2200000.0 | $A_{HC}$ (wat/lig) | 2200000.0 |
|                | kcal/mol          | $A_{ON}$           | 2183089.5 | $A_{HN}$           | 68223.1   |
|                | kcal/mol          | $A_{HH}$ (lig/wat) | 75000.0   | $A_{HH}$ (lig/lig) | 75000.0   |
|                | kcal/mol          | $A_{CC}$           | 500000.0  | $A_{NN}$           | 100000.0  |
|                | kcal/mol          | $A_{CN}$           | 1000000.0 | $A_{OH}$           | 60000.0   |
| $U_{HN}^{shb}$ | kcal/mol          | $d_e$              | 1.310     |                    |           |
|                | $\text{\AA}$      | $r_e$              | 1.604     |                    |           |
|                | $\text{\AA}^2$    | $\gamma_r$         | 2.598     |                    |           |
|                | rad <sup>2</sup>  | $\gamma_\psi$      | 0.115     |                    |           |
|                |                   | $\xi$              | 0.031     | $\gamma_{rt}$      | 0.300     |

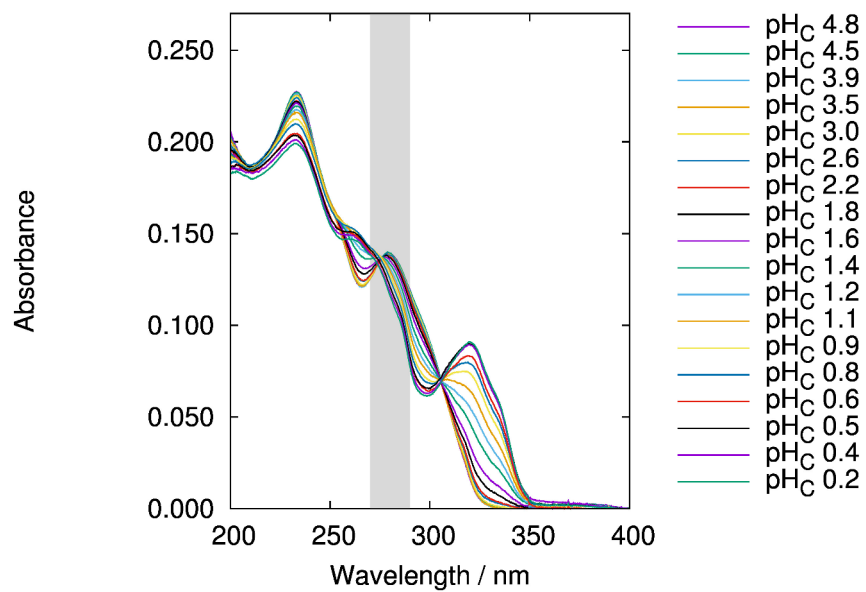

**Figure SI.1:** UV/vis spectra of CyMe<sub>4</sub>-BTP as a function of pH.

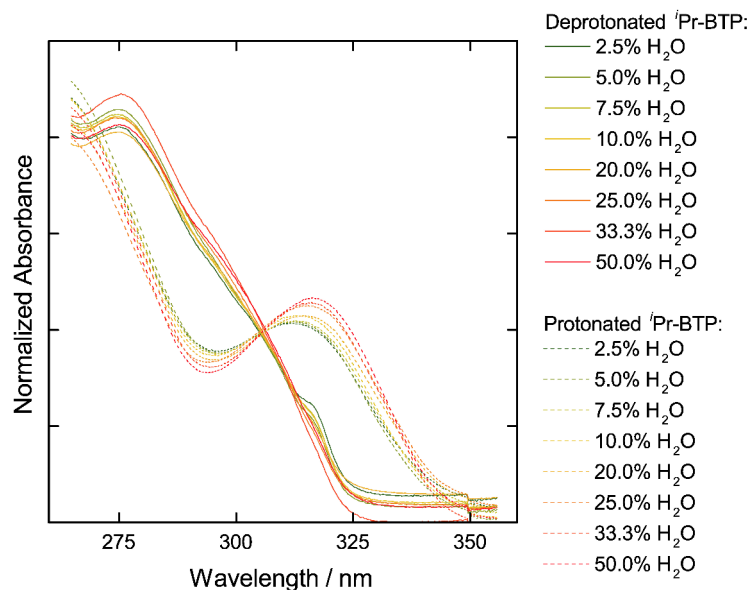

**Figure SI.2:** Normalized UV/vis spectra as a function of water/methanol mixtures.

**Table SI.2:** Molecular structures of the different ligand conformations with corresponding relative energies [ $\text{kcal mol}^{-1}$ ] on the B3LYP/COSMO level using the def2-TZVP basis sets and standard COSMO radii.

|                  |         |           |             |
|------------------|---------|-----------|-------------|
|                  |         |           |             |
|                  | cis/cis | trans/cis | trans/trans |
| $i\text{Pr-BTP}$ | 0.0     | +0.93     | +2.21       |
| $\text{CyMe}_4$  | 0.0     | +1.89     | +1.29       |

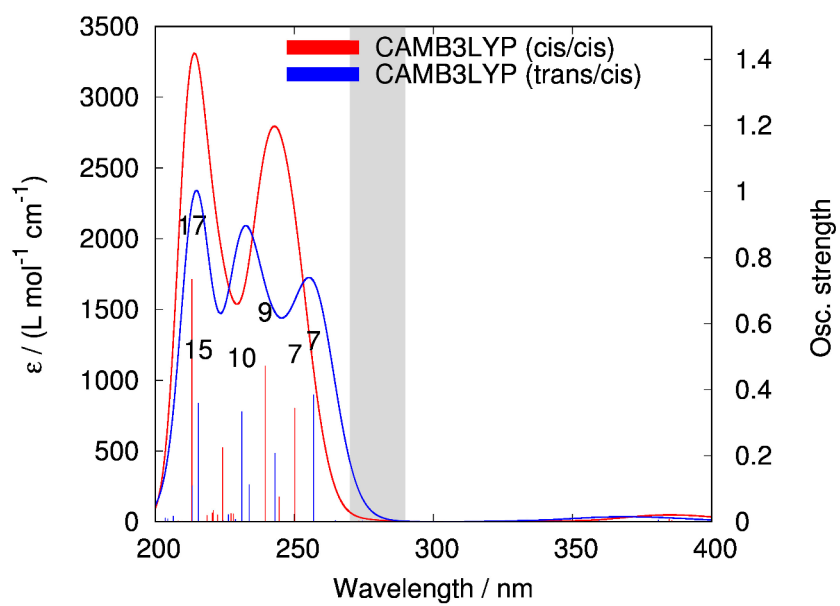

**Figure SI.3:** Comparison of the cis/cis and trans/cis CAM-B3LYP/def2-TZVP gas-phase spectra of *i*Pr-BTP.
